# Supplementary material
Source: PubMed Central journal article supplement (PMC5638888)
Supplement: TJP-595-6443-s001.pdf [file TJP-595-6443-s001.pdf]

## Supplemental Information

Pluskota et al.

### Supplemental Video 1

Mice were injected I.V. with the mixture of fluorescent dye ICG and PBS. Fluorescence intensities were monitored in ear tissue for 0-40 min using IVIS. Representative movies of leakage and accumulation of ICG in mouse ears during the 30 min observational period. The color scale indicates total radiant efficiency: upper blue/purple color indicates maximum, while lower red color indicates minimum total radiant efficiency. Left panel- a WT mouse, right panel- a *Kindlin-2*<sup>+/-</sup> mouse.

### Supplemental Video 2

Mice were injected I.V. with the mixture of fluorescent dye ICG and PAF (6 µg/kg) (PAF). Fluorescence intensities were monitored in ear tissue for 0-40 min using IVIS. Representative movies of leakage and accumulation of ICG in mouse ears during the 30 min observational period. The color scale indicates total radiant efficiency: upper blue/purple color indicates maximum, while lower red color indicates minimum total radiant efficiency. Left panel- a WT mouse, right panel- a *Kindlin-2*<sup>+/-</sup> mouse.
